# Supplementary material
Source: PubMed Central journal article supplement (PMC5832445)
Supplement: NIHMS944451-supplement-supplement_1.pdf [file NIHMS944451-supplement-supplement_1.pdf]

# **SUPPLEMENTAL MATERIAL**

**Online Table:** Characteristics of patients with normal (non-diseased) atria

|    | <b>Atrium</b> | <b>Gender</b> | <b>Age</b> | <b>Cause of death</b>      | <b>Drugs</b>          |
|----|---------------|---------------|------------|----------------------------|-----------------------|
| 1. | RA+LA         | female        | 41         | <i>unknown</i>             | Dopamine              |
| 2. | RA+LA         | female        | 18         | Open skull fracture        | Dopamine, Diuretics   |
| 3. | RA+LA         | male          | 18         | Cerebral contusion         | Dopamine              |
| 4. | RA            | female        | 50         | Ruptured cerebral aneurysm | Dopamine, Antibiotics |
| 5. | LA            | female        | 42         | SAH                        | Dopamine, Diuretics   |

RA, right atrium; LA, left atrium; SAH, Subarachnoid haemorrhage

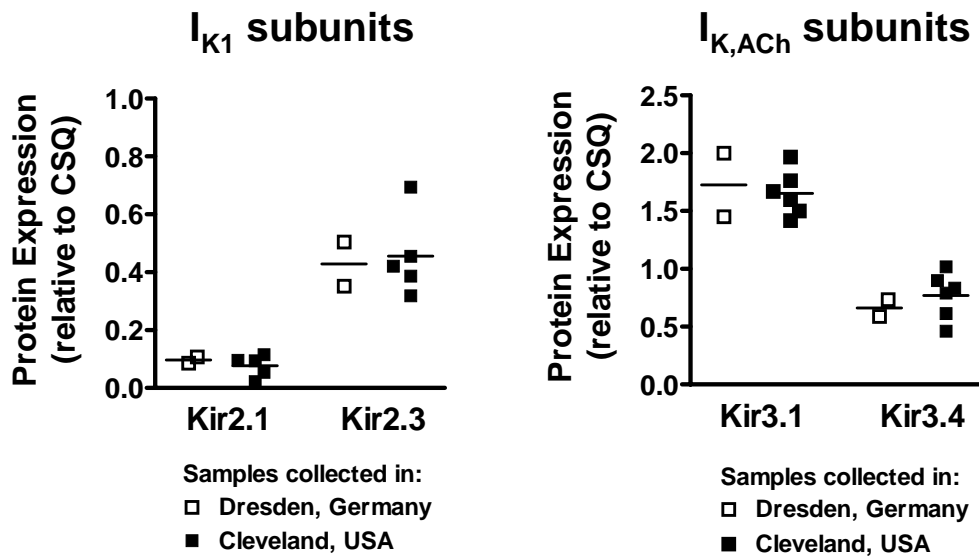

**Online Figure 1.** Center-related comparison of protein expression in left atrial samples from patients with pAF.

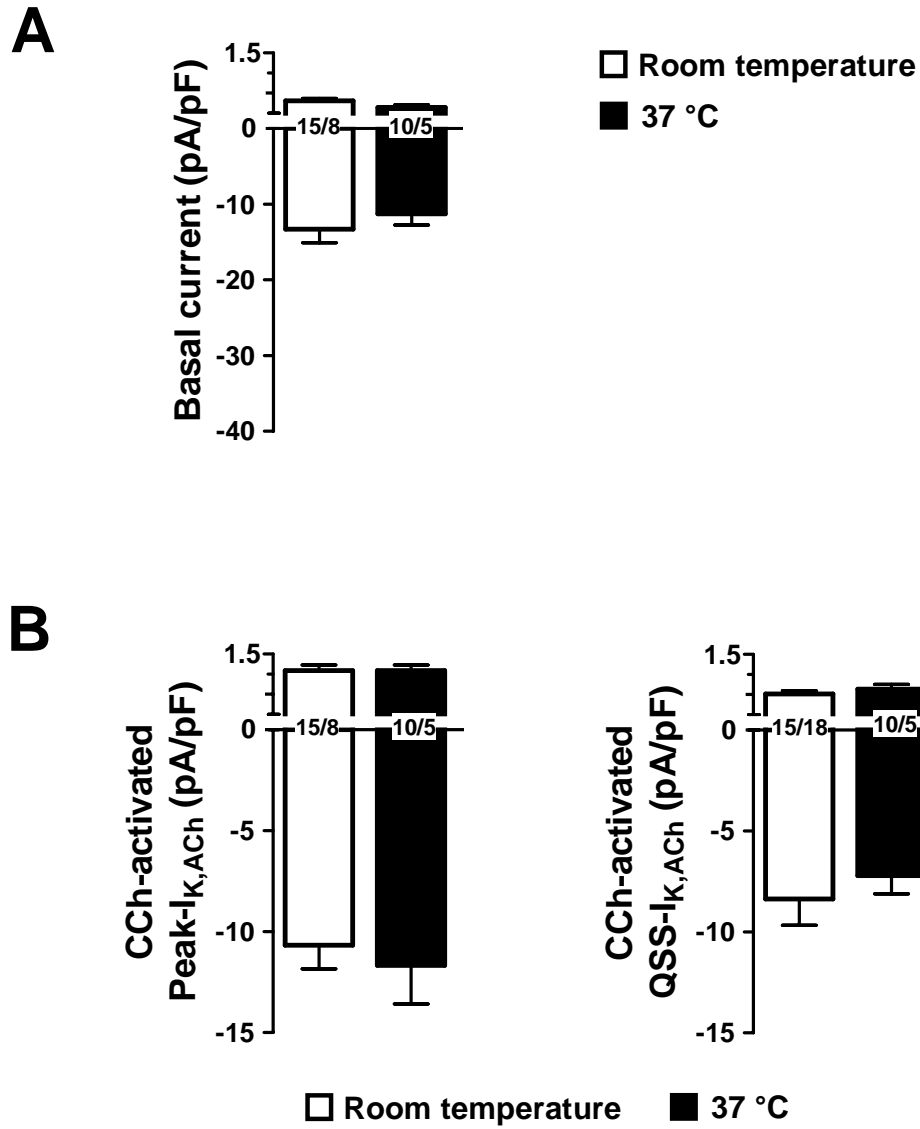

**Online Figure 2.** Temperature dependence of basal (A) inward rectifier current and CCh-activated  $I_{K,ACh}$  (B) in SR patients. Mean $\pm$ SEM. Numbers indicate myocytes/patients.

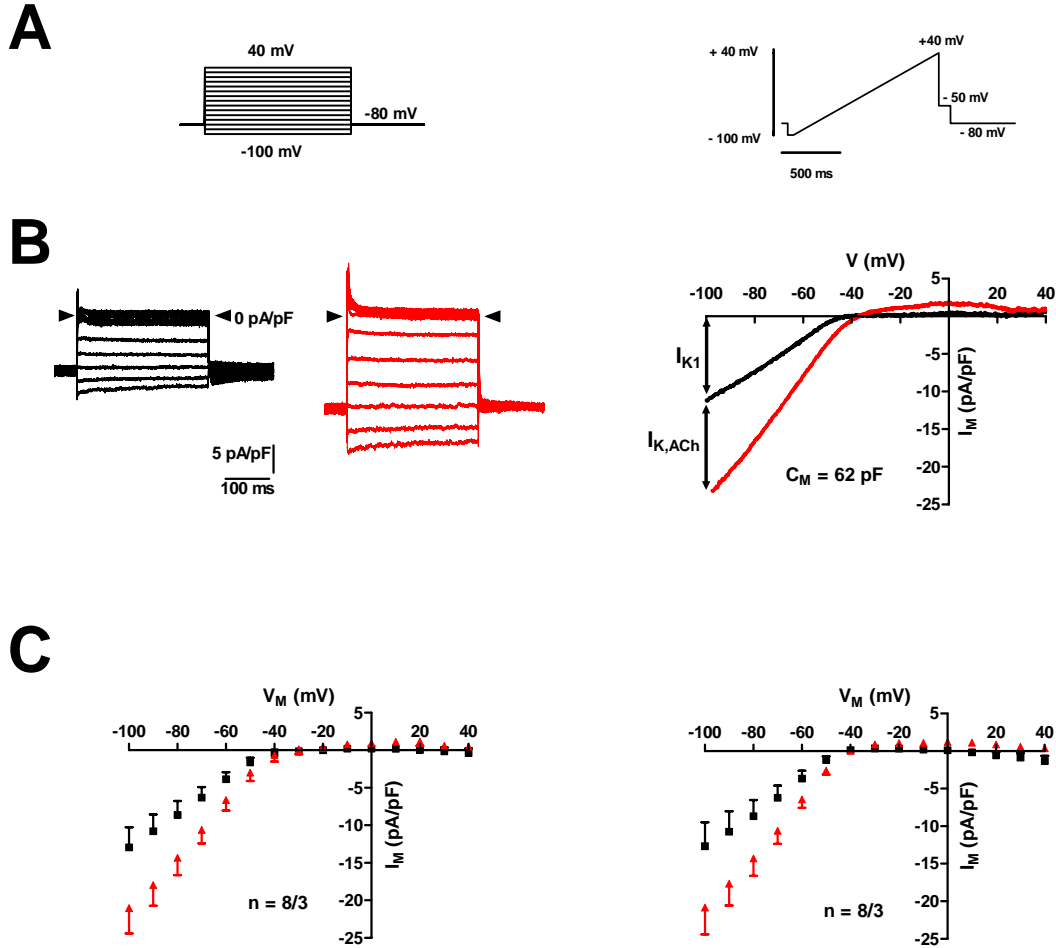

**Online Figure 3.** Comparison of current-voltage relation curves obtained with step pulse (A, left panel) and ramp-pulse (A, right panel) protocol respectively. B, Corresponding currents in absence (black) and presence (red) of CCh (2  $\mu$ M) to activate  $I_{K,ACh}$ . C, Corresponding current voltage relationship. Mean  $\pm$  SEM. Numbers indicate myocytes/patients.

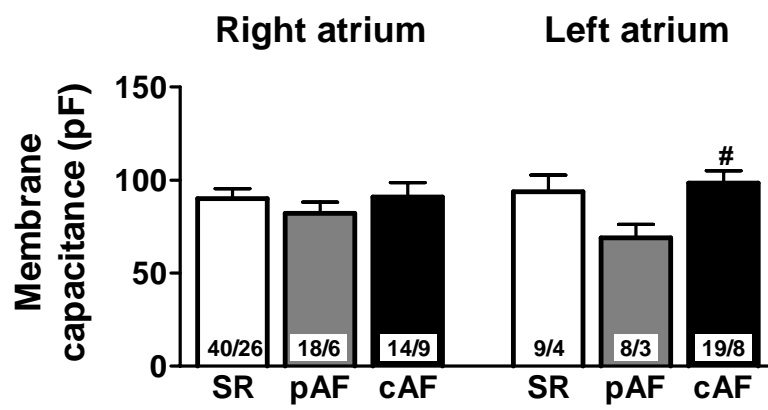

**Online Figure 4.** Membrane capacitance measurements in right and left atrial appendages from patients with SR, pAF and cAF. Mean $\pm$ SEM. Numbers indicate myocytes/patients. #P<0.05 vs. corresponding values in pAF.

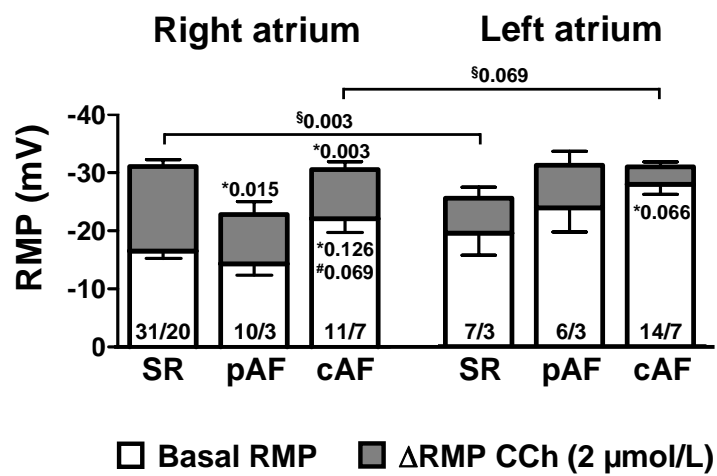

**Online Figure 5.** Basal resting membrane potential (basal RMP) and CCh-induced hyperpolarisation ( $\Delta$ RMP CCh) in right and left atrial myocytes from patients with SR, pAF and cAF. Numbers indicate myocytes/patients. Mean $\pm$ SEM. \*P<0.05 and #P<0.05 vs. corresponding values in SR and pAF. §P<0.05 vs. corresponding values in right or left atrium, respectively. P-values within columns refer to basal RMP, whereas all other P-values refer to  $\Delta$ RMP CCh.

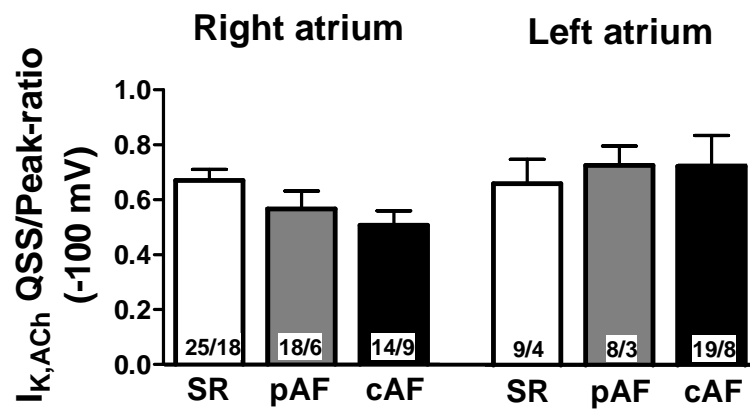

**Online Figure 6.** Mean ± SEM of I<sub>K,ACh</sub> Peak/QSS-ratio as an index of I<sub>K,ACh</sub> desensitization (see Figures 3 and 4). Numbers indicate myocytes/patients.



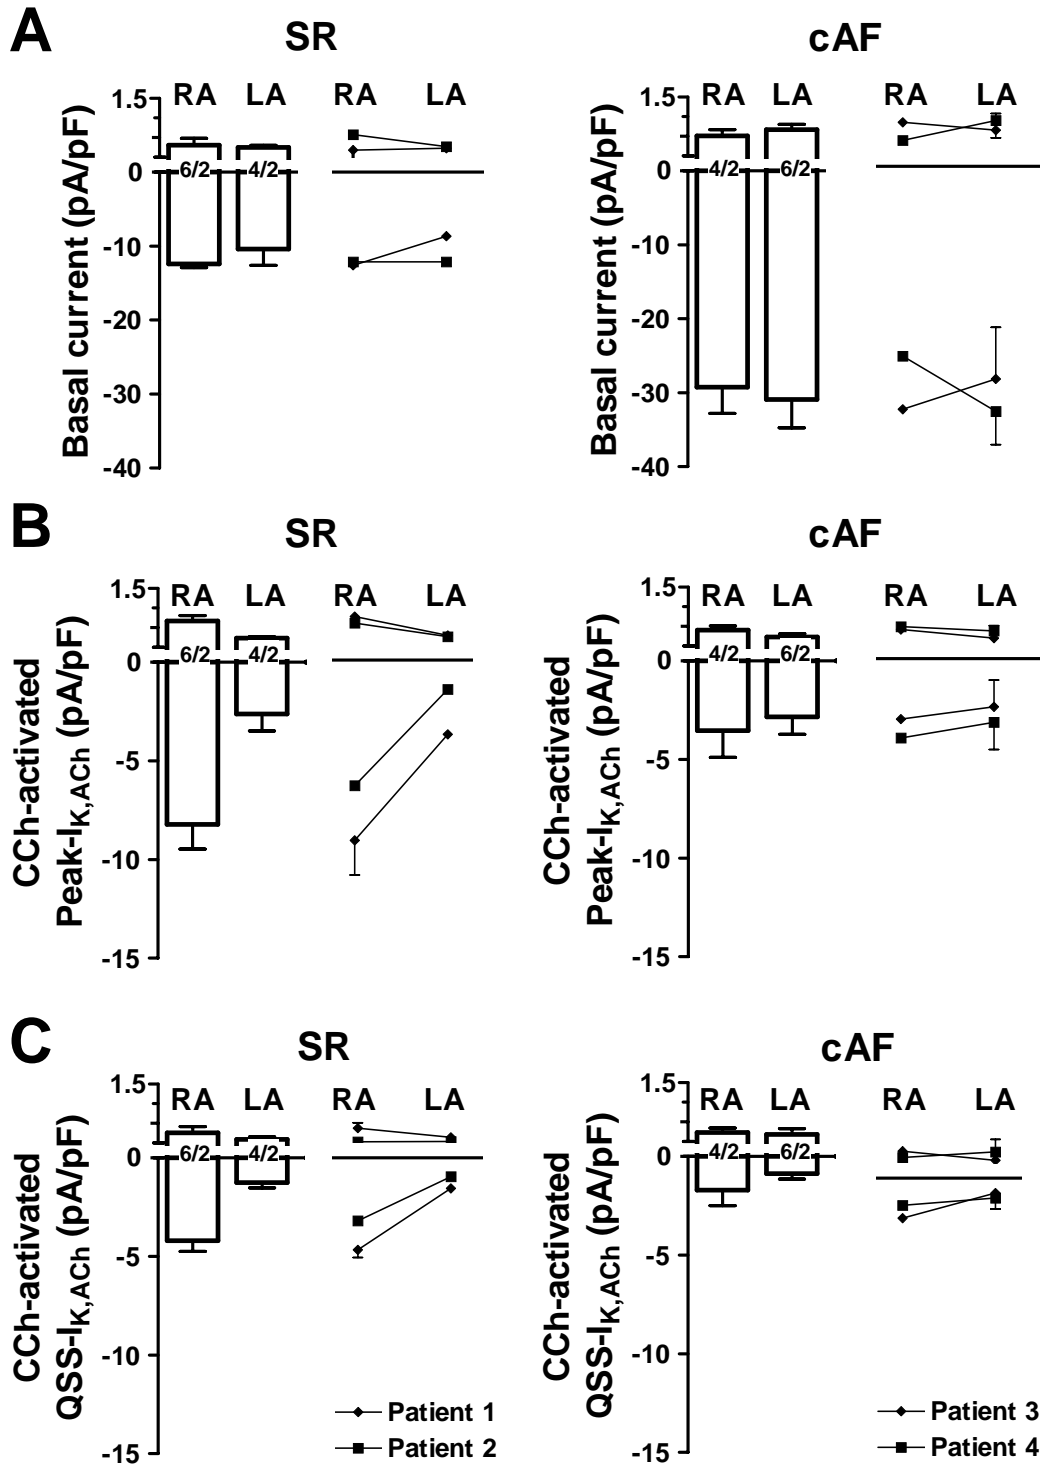

**Online Figure 7.** Basal inward rectifier current (A) and  $I_{K,ACh}$  (B, C) from matched RA and LA samples obtained from the same SR (left, n=2) and cAF (right, n=2) patients. Columns represent Mean $\pm$ SEM. Numbers indicate myocytes/patients. Symbols indicate corresponding mean values of each patient.

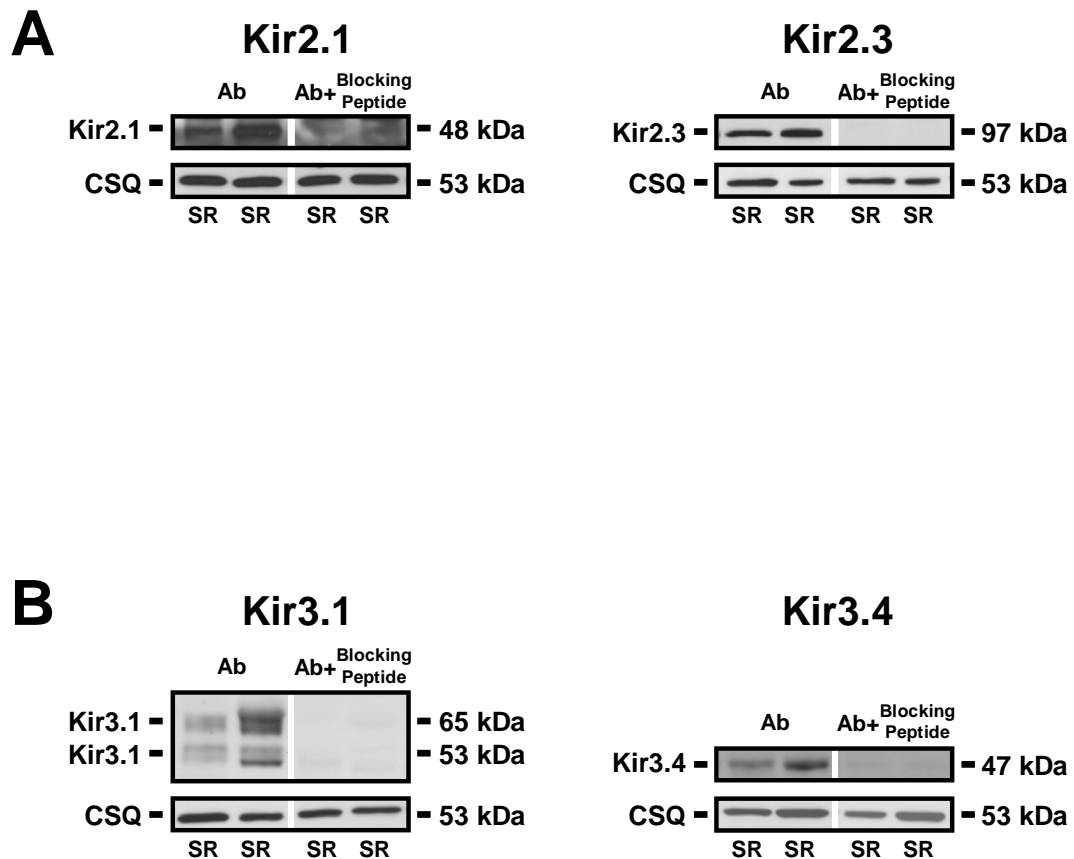

**Online Figure 8.** Specificity of used antibodies for Western blot. Specificity of bands recognized by the specific antibodies against Kir2.1, Kir2.3 (**A**), Kir3.1 and Kir3.4 (**B**) is demonstrated by incubation of the individual antibodies (Ab) with their corresponding immunizing peptides (Ab+Blocking Peptide) which prevents binding of the antibodies to their protein targets. Calsequestrin (CSQ) levels were used as internal (loading) controls. Non-contiguous lanes are separated by white lines.

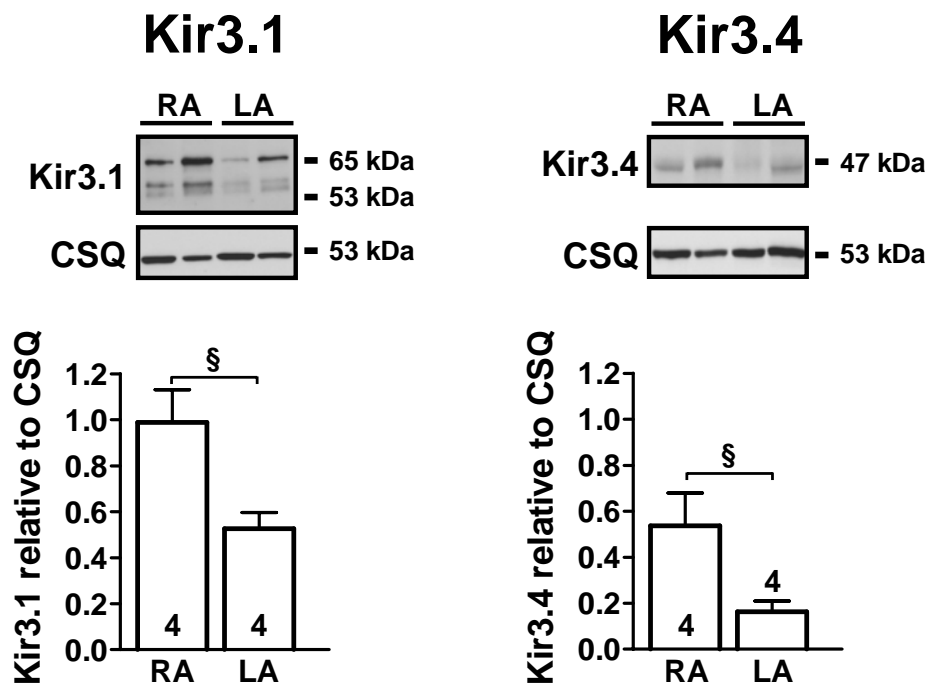

**Online Figure 9.** Expression of  $I_{K,ACh}$ -channel subunits in right (RA) and left (LA) atrial appendages from normal (non-diseased) atria. Representative immunoblots and densitometric analysis of Kir3.1 (left) and Kir3.4 (right) subunits. Numbers indicate tissue samples. § $P < 0.05$  vs. corresponding values in right atrium.

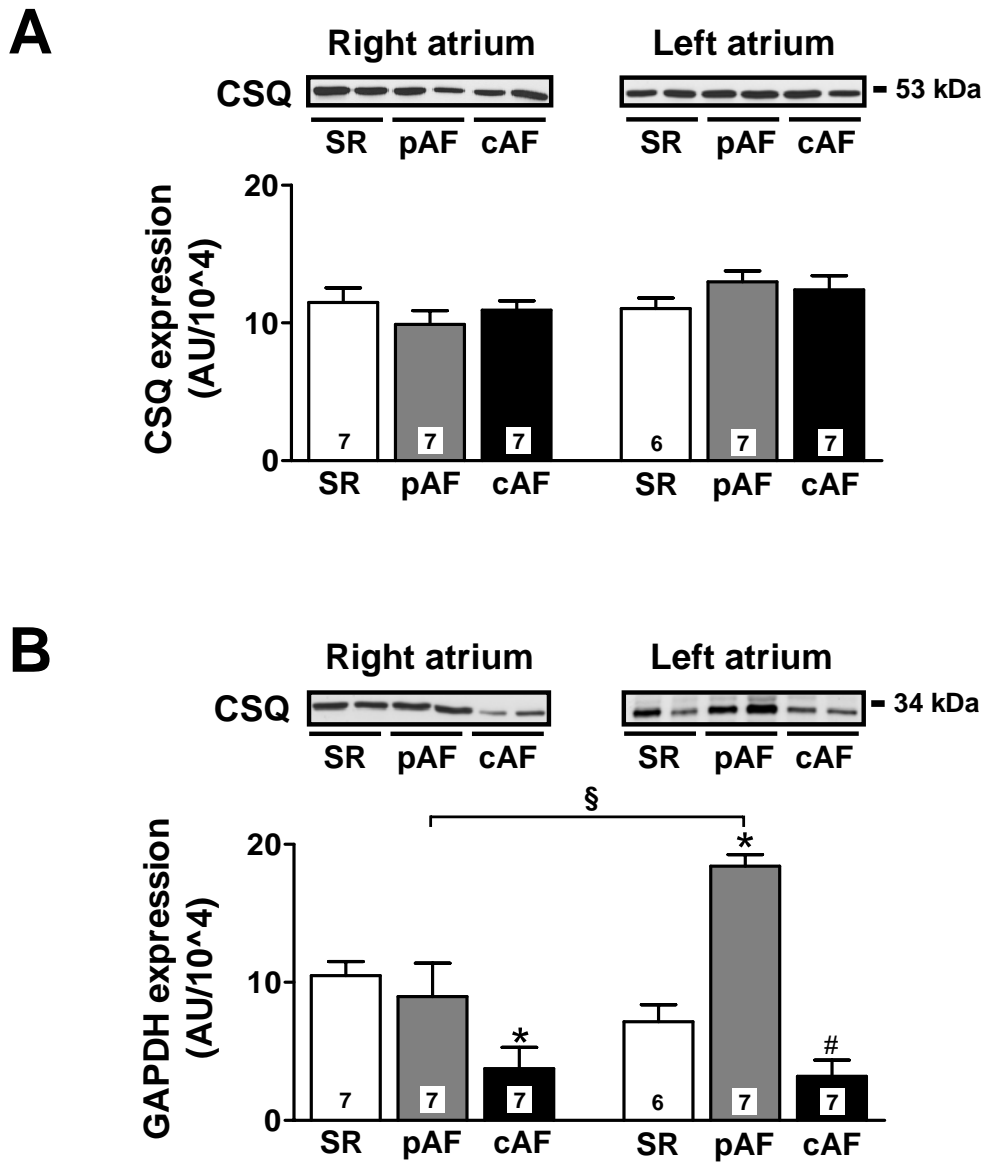

**Online Figure 10.** Comparison of CSQ (A) and GAPDH (B) protein levels (arbitrary units, AU) in right (RA) and left (LA) atria from SR, pAF and cAF patients. \*P<0.05 vs. corresponding SR and pAF; #P<0.05 vs. corresponding pAF; §P<0.05 vs. pAF in RA.
